# Supplementary material for: Enhanced photoelectrochemical performance of tungsten oxide film by bifunctional Au nanoparticles
Source: Royal Society of Chemistry journal article supplement (doi:10.1039/c7ra01426k), 2017-01-01
Supplement: c7ra01426k1.pdf [file c7ra01426k1.pdf]

## Enhanced photoelectrochemical performance of tungsten oxide film by bifunctional Au nanoparticles

Yueqi Kong<sup>a, b)</sup>, Honggang Sun<sup>a)\*</sup>, Weiliu Fan<sup>b)</sup>, Li Wang<sup>a)</sup>, Hongkai Zhao<sup>b)</sup>, Xian Zhao<sup>b)\*</sup>, Shengzhong Yuan<sup>c)</sup>

*a) School of Mechanical, Electrical & Information Engineering, Shandong University, Weihai, 264209, China*

*b) State Key Laboratory of Crystal Materials, Shandong University, Jinan 250100, China*

*c) Supercomputing Center, Shandong University, Weihai, 264509, China*

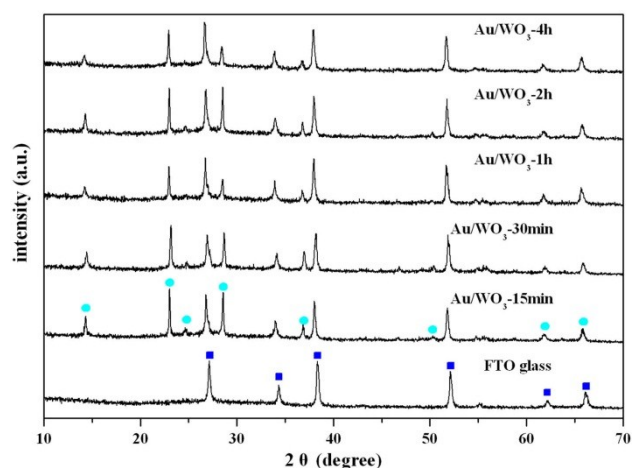

S1. X-ray diffraction (XRD) patterns for the Au/WO<sub>3</sub>-X samples.

---

\*To whom all correspondences should be addressed. Tel: 86-531-88366330, Fax: 86-531-88364864, E-mail: [sunhg@sdu.edu.cn](mailto:sunhg@sdu.edu.cn), [zhaoxian@sdu.edu.cn](mailto:zhaoxian@sdu.edu.cn).

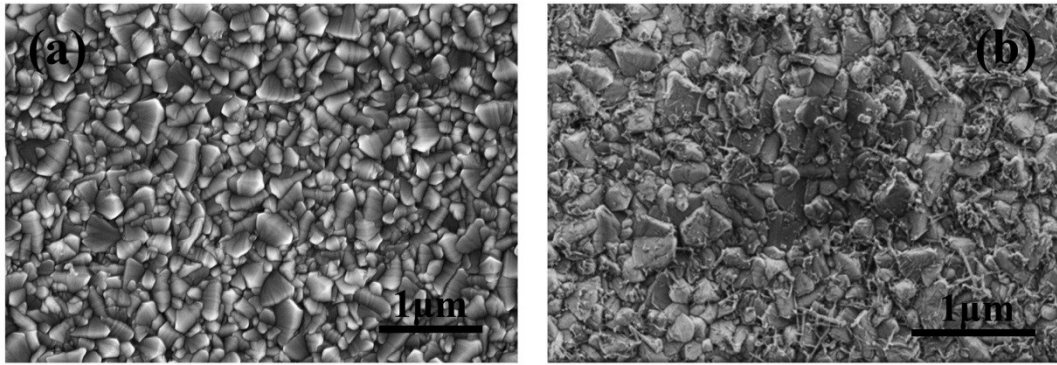

S2. Top-view SEM images of (a) the bare FTO glass and (b) the FTO glass with crystal seed.

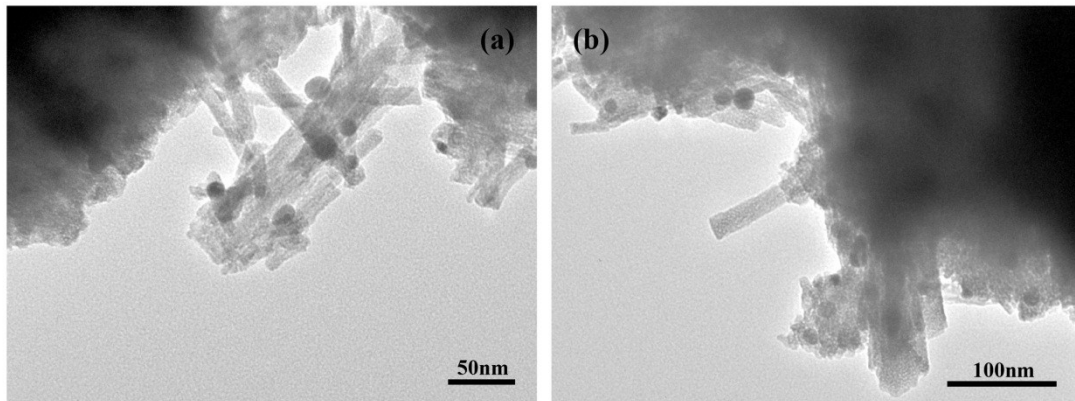

S3. The HRTEM of (a) Au/WO<sub>3</sub>-2h and (b) Au/WO<sub>3</sub>-4h samples. The diameter of the Au nanoparticles are about 25nm.

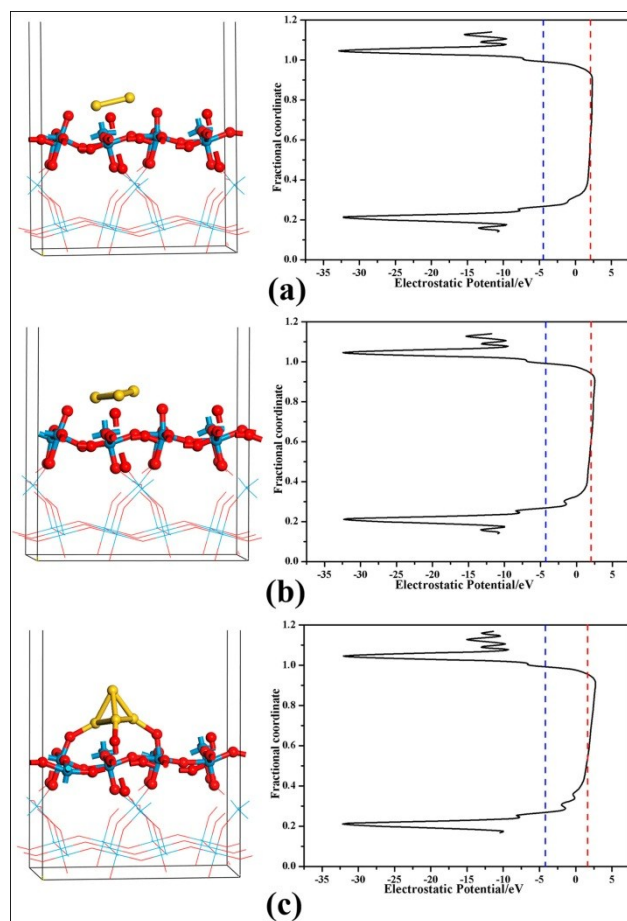

S4. The surface structures (left) and potentials (right) for  $\text{WO}_3$  (010) face with (a) two, (b) three, and (c) four Au atoms. The calculated work functions for the three models are 6.71, 6.06, and 5.57 eV.

### Theoretical parameters

Density functional theory (DFT) calculations were performed using Cambridge Sequential Total Energy Package (CASTEP). The generalized gradient approximation

(GGA) with the Perdew-Burke-Ernzerhof (PBE) functional was used for the exchange and correlation interactions. The ultrasoft pseudopotential was used to deal with the core electrons and the valence electrons are O  $2s^2 2p^4$ , W  $5s^2 5p^6 5d^4 6s^2$ , and Au  $5d^{10} 6s^1$ . The hexagonal  $WO_3$  crystal cell with P6/MMM space group was completely relaxed in the present work. To achieve the accurate lattice parameters, the plane wave cutoff was set as 340.0 eV, and the k-point of  $2 \times 2 \times 4$  was used for the relaxation using the Monkhorst-Pack scheme. All forces on atoms were converged to less than 0.03 eV/Å, the maximum ionic displacement was within 0.001 Å, and the total stress tensor was reduced to the order of 0.05 GPa. The optimized lattice parameters were  $a=b=7.454$  Å and  $c=3.830$  Å, in good agreement with the experimental value of  $a=b=7.298$  Å, and  $c=3.899$  Å. The  $WO_3$  (010) surfaces without/with Au atoms were modeled using the relaxed crystal cell. The models consisted of  $(2 \times 2)$  unit cell with seven atom layers and a 30 Å vacuum layer. The above models were fully relaxed using k-points of  $2 \times 2 \times 1$ .
